# Supplementary material
Source: publisher figshare collection journal article supplement (https://tandf.figshare.com/ndownloader/files/36011805)
Supplement: Supplementary file 1 [file 36011805]

### Gene expression of DLEU2 in Stomach adenocarcinoma

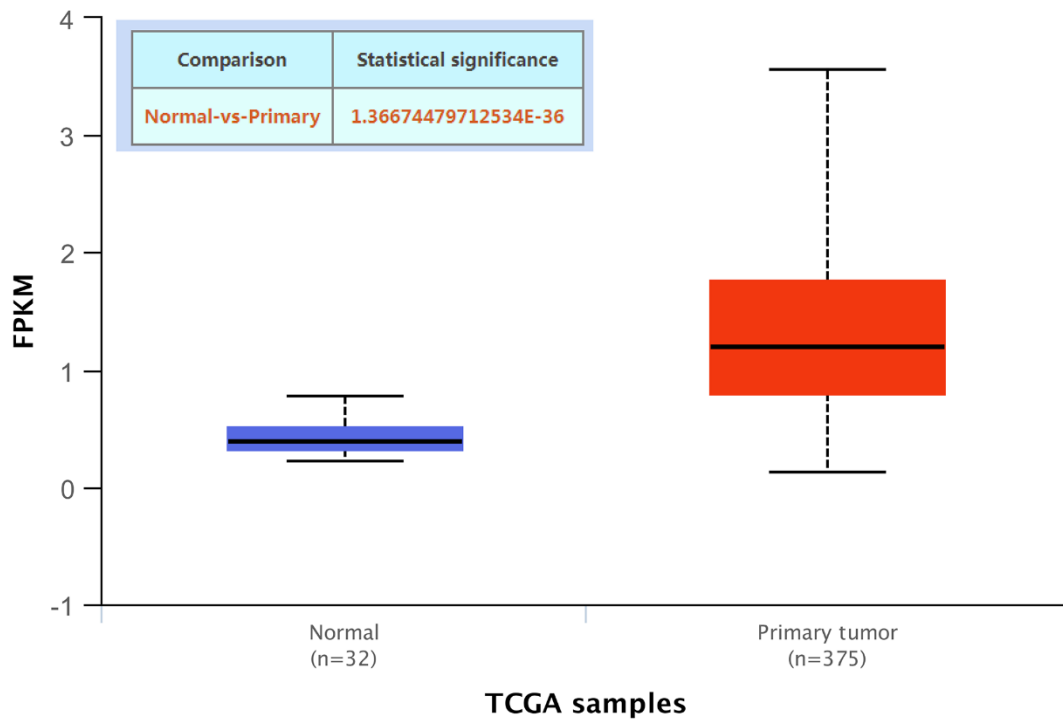

**Supplementary figure 1. The expression profiles of lncRNA DLEU2 were obtained from the UALCAN.**
